# Supplementary material
Source: PubMed Central journal article supplement (PMC4699919)
Supplement: mmc1.pdf [file mmc1.pdf]

**Biophysical Journal**

**Supporting Material**

**Katanin Severing and Binding Microtubules Are Inhibited by Tubulin Carboxy Tails**

Megan E. Bailey,<sup>1,2</sup> Dan L. Sackett,<sup>3</sup> and Jennifer L. Ross<sup>2,\*</sup>

<sup>1</sup>Molecular and Cellular Biology Graduate Program and <sup>2</sup>Department of Physics, University of Massachusetts-Amherst, Amherst, Massachusetts; and <sup>3</sup>Program in Physical Biology, Eunice Kennedy Shriver National Institute of Child Health and Human Development, National Institutes of Health, Bethesda, Maryland

**Supplemental Table 1: Fits for data in Figure 1**

|                                                                                                  |                         |                              |  |                   |              |
|--------------------------------------------------------------------------------------------------|-------------------------|------------------------------|--|-------------------|--------------|
| Microtubules Alone, fit equation: $I(t) = I_0 \left(1 - \frac{t}{\tau}\right)$ (Eq. 3)           |                         |                              |  |                   |              |
| $I_0 = 1.012 \pm 0.002$                                                                          | $\tau = 3400 \pm 100$ s |                              |  | $\chi^2 = 0.0073$ | $R^2 = 0.93$ |
| MTs + XI-p60, fit equation: $I(t) = I_0 \exp\left(-\frac{t}{\tau}\right)$ (Eq. 1)                |                         |                              |  |                   |              |
| $I_0 = 1.25 \pm 0.04$                                                                            | $\tau = 62 \pm 2$ s     |                              |  | $\chi^2 = 0.30$   | $R^2 = 0.95$ |
| MTs + GFP-Hu-p60, fit equation: $I(t) = I_0 \exp\left(-\frac{t}{\tau}\right) + I_\infty$ (Eq. 2) |                         |                              |  |                   |              |
| $I_0 = 0.99 \pm 0.03$                                                                            | $\tau = 66 \pm 3$ s     | $I_\infty = 0.099 \pm 0.008$ |  | $\chi^2 = 0.18$   | $R^2 = 0.95$ |

**Supplemental Table 2: Fits for data in Figure 2**

| Exponential Growth Phase (i) Binding Rates fit equation: $I(t) = A \exp\left(t / \tau_{bind}\right)$ (Eq 4)             |                                             |                               |                    |                |
|-------------------------------------------------------------------------------------------------------------------------|---------------------------------------------|-------------------------------|--------------------|----------------|
| Concentration of Hu-p60                                                                                                 | A                                           | $\tau_{bind}$ (s)             | $\chi^2$           | R <sup>2</sup> |
| 50 nM                                                                                                                   | 0.34 ± 0.01                                 | 6.3 ± 0.2                     | 28                 | 0.80           |
| 100 nM                                                                                                                  | 0.084 ± 0.010                               | 3.0 ± 0.2                     | 15                 | 0.72           |
| 200 nM                                                                                                                  | 0.18 ± 0.01                                 | 3.32 ± 0.10                   | 20                 | 0.87           |
| 300 nM                                                                                                                  | 0.117 ± 0.007                               | 2.56 ± 0.07                   | 5.9                | 0.87           |
| 400 nM                                                                                                                  | 0.115 ± 0.007                               | 1.84 ± 0.05                   | 2.6                | 0.92           |
| 500 nM                                                                                                                  | 0.029 ± 0.003                               | 1.10 ± 0.03                   | 1.4                | 0.91           |
| Constant phase (ii), Average and Standard Deviation                                                                     |                                             |                               |                    |                |
| Concentration of Hu-p60                                                                                                 | Average                                     |                               | Standard Deviation |                |
| 50 nM                                                                                                                   | 1.80                                        |                               | 0.04               |                |
| 100 nM                                                                                                                  | 2.35                                        |                               | 0.04               |                |
| 200 nM                                                                                                                  | 3.19                                        |                               | 0.04               |                |
| 300 nM                                                                                                                  | 2.79                                        |                               | 0.05               |                |
| 400 nM                                                                                                                  | 3.16                                        |                               | 0.14               |                |
| 500 nM                                                                                                                  | 1.86                                        |                               | 0.06               |                |
| Exponential Decay Phase (iii) Severing Rates fit equation: $I(t) = \exp\left(-\frac{t-t_0}{\tau_{sever}}\right)$ (Eq 5) |                                             |                               |                    |                |
| Concentration of Hu-p60                                                                                                 | $t_0$                                       | $\tau_{sever}$                | $\chi^2$           | R <sup>2</sup> |
| 50 nM                                                                                                                   | 43.66 ± 0.03                                | 16.97 ± 0.06                  | 2.7                | 0.990          |
| 100 nM                                                                                                                  | 36.18 ± 0.02                                | 16.55 ± 0.05                  | 1.2                | 0.995          |
| 200 nM                                                                                                                  | 34.60 ± 0.02                                | 7.95 ± 0.03                   | 1.3                | 0.995          |
| 300 nM                                                                                                                  | 28.55 ± 0.01                                | 6.64 ± 0.02                   | 0.99               | 0.995          |
| 400 nM                                                                                                                  | 26.19 ± 0.02                                | 6.05 ± 0.02                   | 1.4                | 0.995          |
| 500 nM                                                                                                                  | 20.29 ± 0.03                                | 8.05 ± 0.06                   | 2.1                | 0.981          |
| Association Rate fit equation: $r([p60]) = k_{on}[p60]$ (Eq 6)                                                          |                                             |                               |                    |                |
| $k_{on} = 0.0016 \pm 0.0002$ 1/(M-s)                                                                                    | $\chi^2 = 0.07$                             |                               | $R^2 = 0.80$       |                |
| Maximum Intensity Binding fit equation: $I([p60]) = I_{max} \frac{[p60]}{K_D + [p60]}$ (Eq 7)                           |                                             |                               |                    |                |
| $I_{max} = 3.5 \pm 0.3$                                                                                                 | $K_D = 45 \pm 20$ nM                        | $\chi^2 = 0.18$               | $R^2 = 0.87$       |                |
| Severing Rate fit equation: $k([p60]) = k_{max} \frac{[p60]}{K_M + [p60]}$ (Eq 8)                                       |                                             |                               |                    |                |
| $k_{max} = 0.19 \pm 0.04$                                                                                               | $K_M = 130 \pm 80$ nM                       | $\chi^2 = 0.0021$             | $R^2 = 0.79$       |                |
| Oligomerization Rate, Constant Phase (ii) fit equation: $r([p60]) = r_0 + k_{olig}[p60]$ (Eq 9)                         |                                             |                               |                    |                |
| $r_0 = 0.017 \pm 0.002$ 1/s                                                                                             | $k_{olig} = 0.000052 \pm 0.000007$ 1/(nM-s) | $\chi^2 = 2.9 \times 10^{-5}$ | $R^2 = 0.94$       |                |

**Supplemental Table 3: Fits for data in Figure 3**

|                                                                                                                                           |                         |                              |  |                                |
|-------------------------------------------------------------------------------------------------------------------------------------------|-------------------------|------------------------------|--|--------------------------------|
| Microtubules alone: $I(t) = I_0 \left(1 - \frac{t}{\tau}\right)$                                                                          |                         |                              |  |                                |
| $I_0 = 1.0 \pm 0.4$                                                                                                                       | $\tau = 10^{20}$ s      |                              |  | $\chi^2 = 0.14$ $R^2 = 0.08$   |
| Microtubules + p60, fit equation: $I(t) = I_0 \exp\left(-\frac{t}{\tau}\right) + I_\infty$                                                |                         |                              |  |                                |
| $I_0 = 0.73 \pm 0.02$                                                                                                                     | $\tau = 47 \pm 2$ s     | $I_\infty = 0.106 \pm 0.007$ |  | $\chi^2 = 0.15$ $R^2 = 0.97$   |
| Microtubules + p60 + 50 nM tubulin, fit equation: $I(t) = I_0 \exp\left(-\frac{t}{\tau}\right) + I_\infty$                                |                         |                              |  |                                |
| $I_0 = 0.57 \pm 0.02$                                                                                                                     | $\tau = 270 \pm 19$ s   | $I_\infty = 0.43 \pm 0.02$   |  | $\chi^2 = 0.015$ $R^2 = 0.99$  |
| Microtubules + p60 + 500 nM tubulin, fit equation: $I(t) = I_0 \left(1 - \frac{t}{\tau}\right)$                                           |                         |                              |  |                                |
| $I_0 = 1.053 \pm 0.007$                                                                                                                   | $\tau = 5000 \pm 600$ s |                              |  | $\chi^2 = 0.064$ $R^2 = 0.43$  |
| Microtubules + p60 + 1 $\mu$ M tubulin, fit equation: $I(t) = I_0 \exp\left(-\frac{t}{\tau}\right) + I_\infty$                            |                         |                              |  |                                |
| $I_0 = 0.3 \pm 0.2$                                                                                                                       | $\tau = 1100 \pm 800$ s | $I_\infty = 0.6 \pm 0.2$     |  | $\chi^2 = 0.0063$ $R^2 = 0.92$ |
| Microtubules + p60 + 6 $\mu$ M tubulin, fit equation: $I(t) = I_0 \exp\left(-\frac{t}{\tau}\right) + I_\infty$                            |                         |                              |  |                                |
| $I_0 = 0.150 \pm 0.005$                                                                                                                   | $\tau = 170 \pm 20$ s   | $I_\infty = 0.879 \pm 0.006$ |  | $\chi^2 = 0.007$ $R^2 = 0.92$  |
| Microtubules + p60 + 10 $\mu$ M tubulin, fit equation: $I(t) = I_0 \left(1 - \frac{t}{\tau}\right)$                                       |                         |                              |  |                                |
| $I_0 = 0.993 \pm 0.003$                                                                                                                   | $\tau = 5100 \pm 300$ s |                              |  | $\chi^2 = 0.012$ $R^2 = 0.78$  |
| Maximum GFP-Katanin Intensity, fit equation: $c[tub] = c_0 \left( \frac{1}{1 + \left( \frac{[tub]}{K_{D,app}} \right)^n} \right)$ (Eq 10) |                         |                              |  |                                |
| $c_0 = 4.6 \pm 0.1$ nM                                                                                                                    | $n = 0.80 \pm 0.05$     | $K_{D,app} = 90 \pm 10$ nM   |  | $\chi^2 = 0.029$ $R^2 = 0.998$ |

**Supplemental Table 4: Fits for data in Figure 4**

|                                                                                                                                 |                                               |                              |  |                               |               |
|---------------------------------------------------------------------------------------------------------------------------------|-----------------------------------------------|------------------------------|--|-------------------------------|---------------|
| Microtubules + p60, fit equation: $I(t) = I_0 \left(1 - \frac{t}{\tau}\right)$                                                  |                                               |                              |  |                               |               |
| $I_0 = 1.256 \pm 0.008$                                                                                                         | $\tau = 1310 \pm 80$ s                        |                              |  | $\chi^2 = 0.17$               | $R^2 = 0.69$  |
| Microtubules + p60 + 50 nM tubulin, fit equation: $I(t) = I_0 \exp\left(-\frac{t}{\tau}\right) + I_\infty$                      |                                               |                              |  |                               |               |
| $I_0 = 1.44 \pm 0.02$                                                                                                           | $\tau = 59 \pm 2$ s                           | $I_\infty = 0.471 \pm 0.008$ |  | $\chi^2 = 0.083$              | $R^2 = 0.99$  |
| Microtubules + p60 + 500 nM tubulin, fit equation: $I(t) = I_0 \exp\left(-\frac{t}{\tau}\right) + I_\infty$                     |                                               |                              |  |                               |               |
| $I_0 = 0.70 \pm 0.02$                                                                                                           | $\tau = 58 \pm 3$ s                           | $I_\infty = 0.392 \pm 0.008$ |  | $\chi^2 = 0.081$              | $R^2 = 0.96$  |
| Microtubules + p60 + 1 $\mu$ M tubulin, fit equation: $I(t) = I_0 \exp\left(-\frac{t}{\tau}\right) + I_\infty$                  |                                               |                              |  |                               |               |
| $I_0 = 0.90 \pm 0.02$                                                                                                           | $\tau = 43 \pm 1$ s                           | $I_\infty = 0.210 \pm 0.005$ |  | $\chi^2 = 0.066$              | $R^2 = 0.98$  |
| Microtubules + p60 + 6 $\mu$ M tubulin, fit equation: $I(t) = I_0 \exp\left(-\frac{t}{\tau}\right) + I_\infty$                  |                                               |                              |  |                               |               |
| $I_0 = 0.98 \pm 0.02$                                                                                                           | $\tau = 45 \pm 1$ s                           | $I_\infty = 0.104 \pm 0.004$ |  | $\chi^2 = 0.45$               | $R^2 = 0.99$  |
| Microtubules + p60 + 10 $\mu$ M tubulin, fit equation: $I(t) = I_0 \exp\left(-\frac{t}{\tau}\right) + I_\infty$                 |                                               |                              |  |                               |               |
| $I_0 = 2.34 \pm 0.02$                                                                                                           | $\tau = 31.7 \pm 0.4$ s                       | $I_\infty = 0.012 \pm 0.003$ |  | $\chi^2 = 0.031$              | $R^2 = 0.997$ |
| Characteristic Decay Rate, fit equation: $r([tub]) = r_0 + k_{replace,tub} [tub]$ (Eq 10)                                       |                                               |                              |  |                               |               |
| $r_0 = 0.018 \pm 0.002$ (1/s)                                                                                                   | $k_{off} = 0.00000120 \pm 0.0000004$ (1/nM-s) |                              |  | $\chi^2 = 3.3 \times 10^{-5}$ | $R^2 = 0.77$  |
| Final GFP-Katanin Intensity, fit equation: $c[tub] = c_0 \left( \frac{1}{1 + \left( \frac{[tub]}{K_{D,app}} \right)^n} \right)$ |                                               |                              |  |                               |               |
| $c_0 = 1.08 \pm 0.09$ s                                                                                                         | $K_{D,app} = 40 \pm 30$ nM                    | $n = 0.4 \pm 0.1$            |  | $\chi^2 = 0.22$               | $R^2 = 0.97$  |

**Supplemental Table 5: Fits for data in Figure 5**

|                                                                                                                                                    |                           |                              |  |                   |               |
|----------------------------------------------------------------------------------------------------------------------------------------------------|---------------------------|------------------------------|--|-------------------|---------------|
| Microtubules alone, fit equation: $I(t) = I_0 \left(1 - \frac{t}{\tau}\right)$                                                                     |                           |                              |  |                   |               |
| $I_0 = 0.992 \pm 0.002$                                                                                                                            | $\tau = 18000 \pm 2000$ s |                              |  | $\chi^2 = 0.0051$ | $R^2 = 0.40$  |
| Microtubules + p60, fit equation: $I(t) = I_0 \exp\left(-\frac{t}{\tau}\right) + I_\infty$                                                         |                           |                              |  |                   |               |
| $I_0 = 1.43 \pm 0.03$                                                                                                                              | $\tau = 37.0 \pm 0.7$ s   | $I_\infty = 0.051 \pm 0.002$ |  | $\chi^2 = 0.022$  | $R^2 = 0.993$ |
| Microtubules + p60 + 50 nM tubulin, fit equation: $I(t) = I_0 \exp\left(-\frac{t}{\tau}\right) + I_\infty$                                         |                           |                              |  |                   |               |
| $I_0 = 0.40 \pm 0.01$                                                                                                                              | $\tau = 71 \pm 4$ s       | $I_\infty = 0.743 \pm 0.004$ |  | $\chi^2 = 0.0049$ | $R^2 = 0.98$  |
| Microtubules + p60 + 50 nM tubulin denatured tubulin, fit equation:<br>$I(t) = I_0 \exp\left(-\frac{t}{\tau}\right) + I_\infty$                    |                           |                              |  |                   |               |
| $I_0 = 0.26 \pm 0.05$                                                                                                                              | $\tau = 500 \pm 200$ s    | $I_\infty = 0.78 \pm 0.05$   |  | $\chi^2 = 0.009$  | $R^2 = 0.94$  |
| Microtubules + p60 + 50 nM tubulin denatured subtilisin-treated tubulin,<br>fit equation: $I(t) = I_0 \exp\left(-\frac{t}{\tau}\right) + I_\infty$ |                           |                              |  |                   |               |
| $I_0 = 2.40 \pm 0.09$                                                                                                                              | $\tau = 42 \pm 1$ s       | $I_\infty = 0.149 \pm 0.003$ |  | $\chi^2 = 0.016$  | $R^2 = 0.992$ |

**Supplemental Table 6: Fits for data in Figure 6**

|                                                                                                                                  |                              |                              |  |                   |               |
|----------------------------------------------------------------------------------------------------------------------------------|------------------------------|------------------------------|--|-------------------|---------------|
| Microtubules alone, fit equation: $I(t) = I_0 \left(1 - \frac{t}{\tau}\right)$                                                   |                              |                              |  |                   |               |
| $I_0 = 0.992 \pm 0.002$                                                                                                          | $\tau = 18000 \pm 2000$<br>s |                              |  | $\chi^2 = 0.0051$ | $R^2 = 0.40$  |
| Microtubules + p60, fit equation: $I(t) = I_0 \exp\left(-\frac{t}{\tau}\right) + I_\infty$                                       |                              |                              |  |                   |               |
| $I_0 = 1.43 \pm 0.03$                                                                                                            | $\tau = 37.0 \pm 0.7$ s      | $I_\infty = 0.051 \pm 0.002$ |  | $\chi^2 = 0.022$  | $R^2 = 0.993$ |
| Microtubules + p60 + 50 nM tubulin, fit equation: $I(t) = I_0 \exp\left(-\frac{t}{\tau}\right) + I_\infty$                       |                              |                              |  |                   |               |
| $I_0 = 0.40 \pm 0.01$                                                                                                            | $\tau = 71 \pm 4$ s          | $I_\infty = 0.743 \pm 0.004$ |  | $\chi^2 = 0.0049$ | $R^2 = 0.98$  |
| Microtubules + p60 + 50 nM $\beta$ CTT-BSA, fit equation: $I(t) = I_0 \exp\left(-\frac{t}{\tau}\right) + I_\infty$               |                              |                              |  |                   |               |
| $I_0 = 0.142 \pm 0.004$                                                                                                          | $\tau = 160 \pm 13$ s        | $I_\infty = 0.853 \pm 0.004$ |  | $\chi^2 = 0.006$  | $R^2 = 0.95$  |
| Microtubules + p60 + 50 nM $\alpha$ CTT-BSA, fit equation: $I(t) = I_0 \exp\left(-\frac{t}{\tau}\right) + I_\infty$              |                              |                              |  |                   |               |
| $I_0 = 0.50 \pm 0.01$                                                                                                            | $\tau = 93 \pm 4$ s          | $I_\infty = 0.630 \pm 0.004$ |  | $\chi^2 = 0.017$  | $R^2 = 0.98$  |
| Microtubules + p60 + 50 nM $\Delta Y$ - $\alpha$ CTT-BSA, fit equation: $I(t) = I_0 \exp\left(-\frac{t}{\tau}\right) + I_\infty$ |                              |                              |  |                   |               |
| $I_0 = 0.90 \pm 0.04$                                                                                                            | $\tau = 49 \pm 2$ s          | $I_\infty = 0.537 \pm 0.002$ |  | $\chi^2 = 0.015$  | $R^2 = 0.98$  |

Loss of Polymer Analysis

1. Take movie.

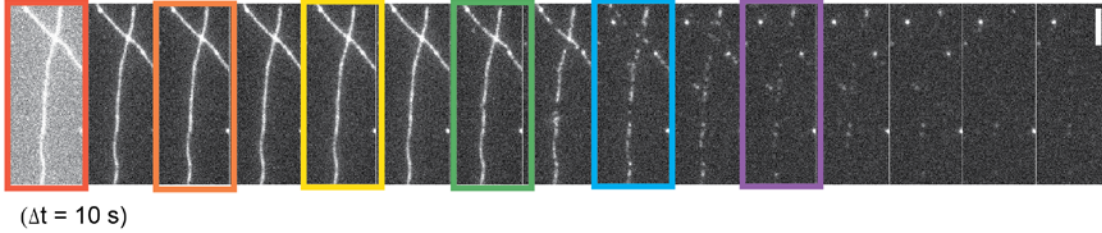

2. Find fluorescence intensities of microtubule and background.

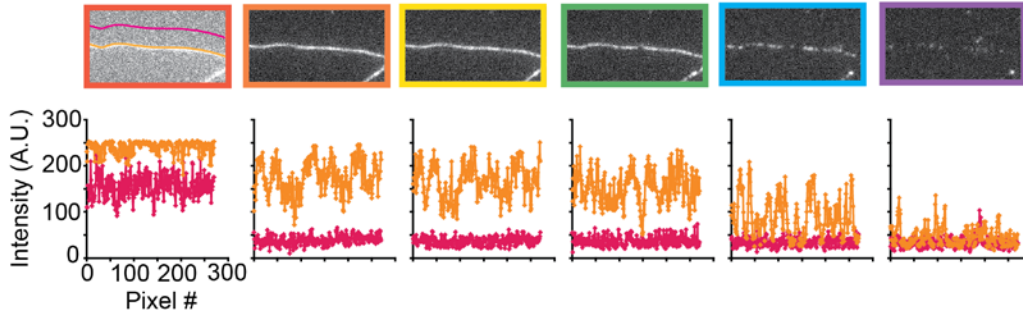

3. Average Intensity on MT and in background (BG)

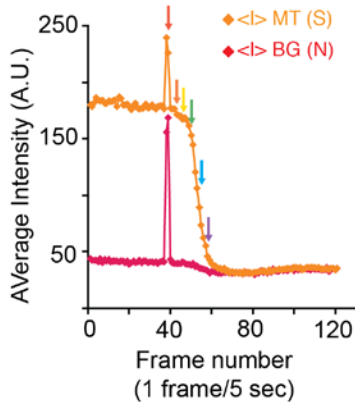

4. Divide average MT intensity (S) by average background (N), subtract 1 to remove background

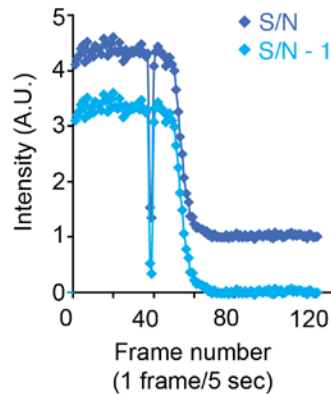

5. Normalized mt intensities (to first frame after p60 added).

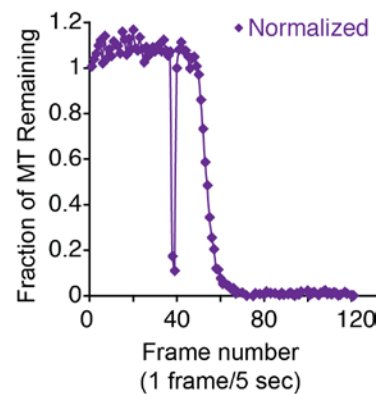

**Supplemental Figure 1** Example displaying how we analyzed data step-by-step. (1) We took a movie of the microtubule over time. Outlined images are shown as examples. (2) For each image, we measured the average intensity along the length of the filament and in the background near the filament. We show the intensity along the length of the microtubule, and we took the average of these traces over the length of the filament. (3) The average intensity of the microtubule (red diamonds, signal) and background (orange diamonds, noise) are shown for one microtubule. The arrows denote the average intensity for the matching color outlined frames. (4) Using the microtubule intensity (S) divided by the intensity on the background (N) gives the ratio of signal to noise (dark blue diamonds). We then subtracted one from this measure (light blue diamonds) to subtract the background. (5) Finally, we normalized each data set so that the data before the katanin is added is on average one. We did this by dividing the data by the intensity of the microtubule before katanin was added. After analyzing individual microtubules this way, we averaged the data from different microtubules together to give an average signal and to find the standard error to give the uncertainty.



### A. Loss of Polymer over Time

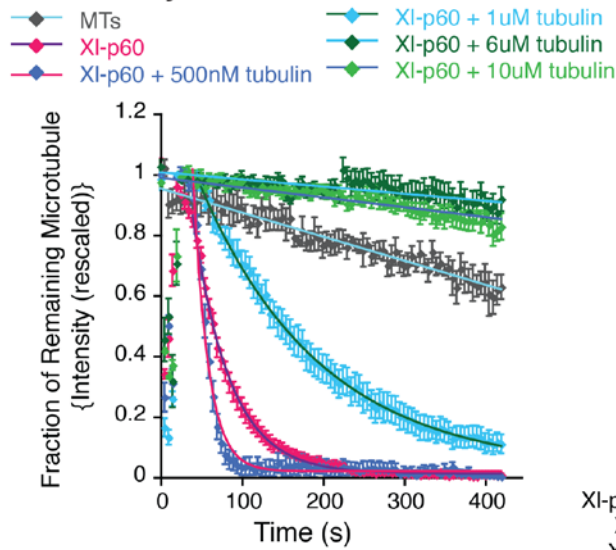

### B. Characteristic Decay Times

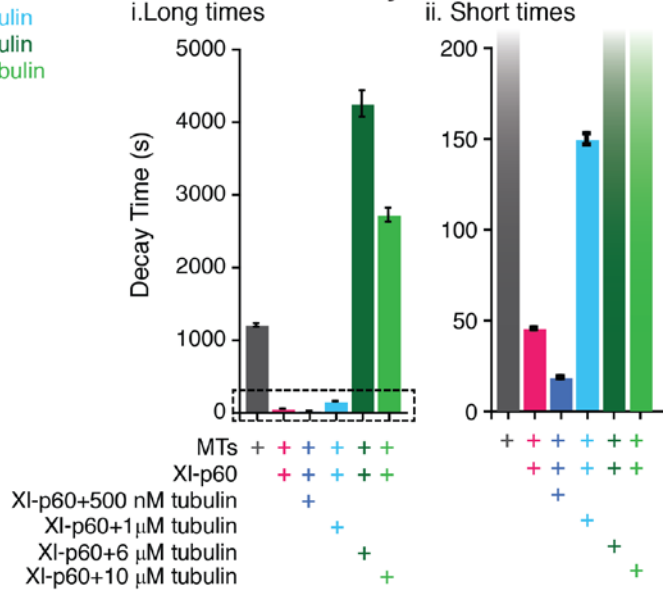

**Supplemental Figure 2.** XI-p60 is inhibited by free tubulin dimers. (A) Plot of the fraction of microtubule remaining for XI-p60 in the presence of increasing amounts of free tubulin. Error bars represent the S.E.M. (B) Plot of the characteristic decay times from fit to data in part A. (i) All decay times for all data sets. (ii) Zoom in of data from part I to facilitate visualization of the fast decay times. Error bars represent the uncertainty from the fits. For the data shown, the numbers of microtubules analyzed were: microtubules alone (N = 4), microtubules with 10  $\mu$ M tubulin (N = 10), microtubules with XI-p60 (N = 55), microtubules with XI-p60 and 500 nM free tubulin (N = 17), microtubules with XI-p60 and 1  $\mu$ M free tubulin (N=14), microtubules with XI-p60 and 6  $\mu$ M free tubulin (N = 10), microtubules with XI-p60 and 10  $\mu$ M free tubulin (N = 15).

### A. Loss of Polymer over Time

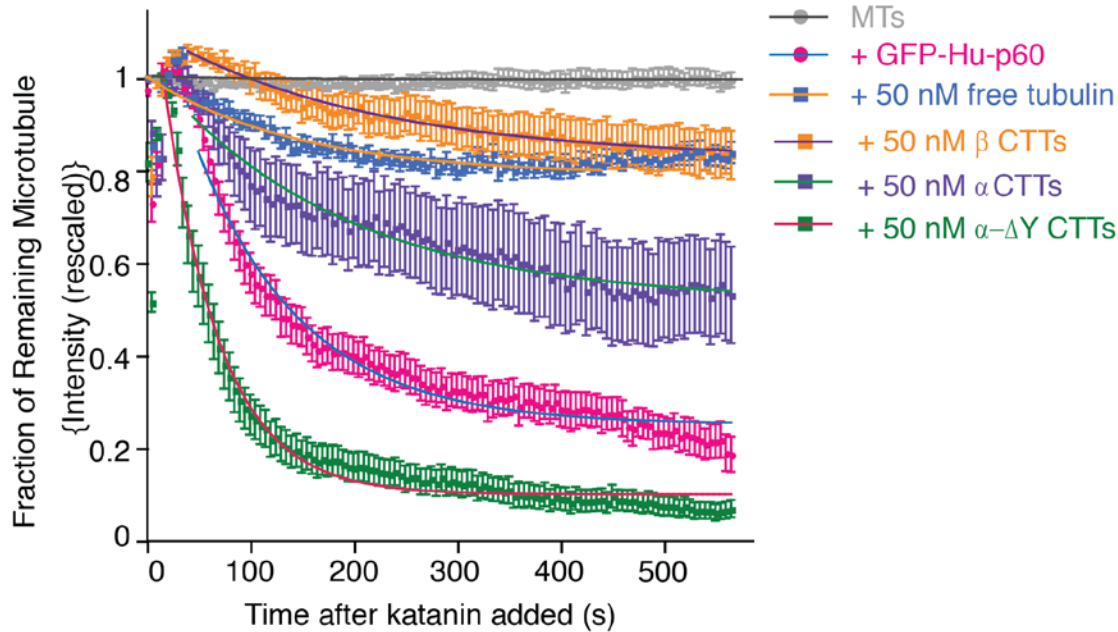

### B. Characteristic Decay Times

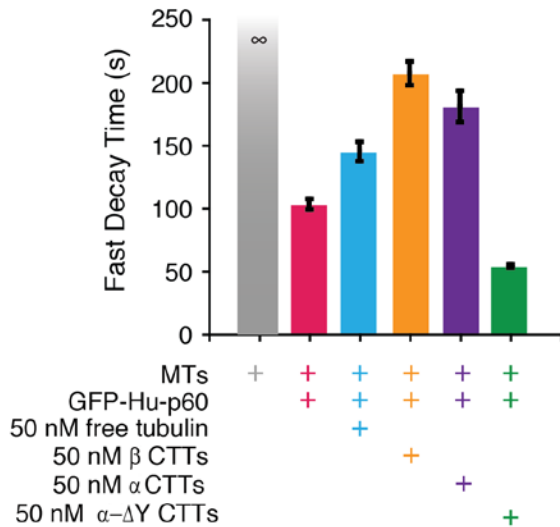

### C. Total Loss of Polymer

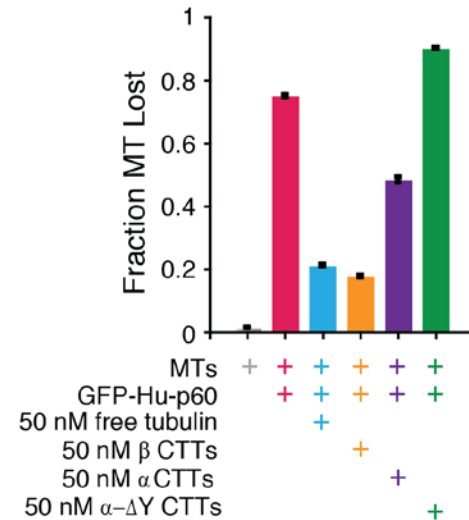

**Supplemental Figure 3** Carboxy-terminal tails of beta, alpha, and detyrosinated alpha tubulin without BSA also inhibit microtubule severing by GFP-Hu-p60. (A) Plot of the fraction of microtubule remaining for GFP-Hu-p60 in the presence of increasing amounts of free tubulin. Data was fit to equation 2. Error bars represent the S.E.M. (B) Plot of the characteristic decay times determined from the exponential decay fits to the data in part A. Error bars represent the uncertainty from the fits. (C) The total loss of polymer was determined from the long-time asymptote from the fits to the data in part A. The error bars represent the uncertainty of the fit parameters. For the data shown, the numbers of microtubules analyzed were: microtubules alone (N = 28), microtubules with GFP-Hu-p60 (N = 29), microtubules with 100 nM GFP-Hu-p60 and 50 nM free tubulin (N = 24), microtubules with GFP-Hu-p60 and 50 nM beta CTTs (N=30), microtubules with GFP-Hu-p60 and 50 nM alpha CTTs (N = 27), microtubules with GFP-Hu-p60 and 50 nM detyrosinated alpha CTTs (N = 37).
